# Supplementary material
Source: MDPI journal article supplement (https://www.mdpi.com/1424-2818/10/1/15)
Supplement: s1 [file s1]

**Table 1** Effects of inoculation of nematode trophic groups on the total amount of phospholipid fatty acids (PLFAs in nmol g−1 DW soil ± s.d.) and on PLFAs indicative for Gram-positive (Gram+), Gram-negative (Gram−), bacteria in general (bacteria), actinobacteria, and fungi, and fungal/bacterial (F/B) PLFA ratio in the rhizosphere soil of *Quercus robur*. Presented are data at 4 and 8 weeks after nematode inoculation. Control—no nematodes inoculated, bacterial feeders—BF (*Acrobeloides buetschlii*), fungal feeders—FF (*Aphelenchoides saprophilus*), plant feeders—PF (*Pratylenchus penetrans*)*.* Values within a row with at least one letter in common are not significantly different (Tukey HSD, *p* < 0.05). (Table from Maboreke [35], modified).

|  | **Control** | **BF** | **FF** | **PF** | **BF+FF** | **BF+PF** | **FF+PF** | **BF+FF+PF** | **ANOVA** | |
| --- | --- | --- | --- | --- | --- | --- | --- | --- | --- | --- |
| **4 weeks** |  |  |  |  |  |  |  |  | ***F*7,37** | ***P*** |
| Total amount | 36.1 ± 2.0cd | 35.7 ± 0.5cd | 34.9 ± 0.7de | 36.5 ±1.5bcd | 37.7 ± 1.3abc | 32.7 ± 1.5de | 39.0 ± 0.6a | 38.9 ± 0.6ab | 16.21 | < 0.001 |
| Gram + | 8.6 ± 0.2cd | 8.7 ± 0.1bcd | 8.5 ± 0.4d | 8.7 ± 0.2bcd | 9.1 ± 0.4ab | 7.1 ± 0.2e | 9.3 ± 0.4a | 9.0 ± 0.0abc | 39.53 | < 0.001 |
| Gram - | 3.4 ± 0.1cd | 3.3 ± 0.0cd | 3.3 ± 0.0d | 3.5 ± 0.1c | 3.7 ± 0.1b | 3.3 ± 0.0d | 4.0 ± 0.1a | 3.8 ± 0.0ab | 52.17 | < 0.001 |
| Bacteria | 6.8 ± 0.6ab | 6.7 ± 0.1ab | 6.3 ± 0.0bc | 6.5 ± 0.5abc | 6.7 ± 0.1ab | 6.06 ± 0.32bc | 7.1 ± 0.1a | 7.0 ± 0.0a | 6.40 | < 0.001 |
| Actinobacteria | 4.4 ± 0.3abc | 4.3 ± 0.1bc | 4.3 ±0.1bc | 4.4 ± 0.4abc | 4.7 ± 0.1ab | 4.2 ± 0.4c | 4.8 ± 0.2a | 4.8 ± 0.1a | 6.11 | < 0.001 |
| Fungi | 3.9 ± 0.6 | 3.7 ± 0.5 | 3.7 ± 0.4 | 3.9 ± 0.6 | 4.1 ± 0.2 | 3.9± 0.5 | 4.2 ± 0.1 | 4.3 ± 0.1 | n.s | n.s |
| F/B ratio | 0.2 ± 0.00 | 0.16 ± 0.02 | 0.17 ± 0.01 | 0.17 ± 0.02 | 0.17 ± 0.01 | 0.19 ± 0.02 | 0.17 ± 0.01 | 0.18 ± 0.00 | n.s | n.s |
| **8 weeks** |  |  |  |  |  |  |  |  | ***F*7, 39** | ***P*** |
| Total amount | 33.4 ± 0.8d | 33.7 ± 0.8d | 30.6 ± 0.5e | 34.0± 0.3d | 35.4 ± 0.8c | 36.3 ± 0.7bc | 36.8 ± 0.4b | 38.1 ± 0.4a | 83.90 | < 0.001 |
| Gram + | 7.9 ± 0.1c | 7.6 ± 0.22d | 7.2 ± 0.2e | 8.2 ± 0.2bc | 8.3 ± 0.2b | 8.8 ± 0.1a | 8.3 ± 0.1b | 8.7 ± 0.0a | 83.00 | < 0.001 |
| Gram - | 3.3 ± 0.1d | 3.3 ± 0.0d | 3.1 ± 0.0e | 3.5 ± 0.0c | 3.70± 0.1b | 3.7 ± 0.1b | 3.6 ± 0.0c | 4.0 ± 0.1a | 178.90 | < 0.001 |
| Bacteria | 5.9 ± 0.1c | 5.5 ± 0.1d | 5.1 ± 0.1e | 5.6 ± 0.1d | 6.3 ± 0.1b | 6.0 ± 0.1c | 6.3 ± 0.1 b | 6.9 ± 0.1a | 190.20 | < 0.001 |
| Actinobacteria | 4.2 ± 0.1e | 4.3 ± 0.1de | 3.8 ± 0.1f | 4.3 ± 0.1e | 4.5 ± 0.0b | 4.5 ± 0.1bc | 4.4 ± 0.1 cd | 4.8 ± 0.1a | 132.20 | < 0.001 |
| Fungi | 3.6 ± 0.1d | 3.8 ± 0.1c | 3.1 ± 0.1e | 3.8 ± 0.1c | 4.02± 0.1b | 4.1 ± 0.1b | 5.0 ± 0.1a | 4.2 ± 0.1b | 227.66 | < 0.001 |
| F/B ratio | 0.17 ± 0.01e | 0.18 ± 0.00b | 0.16 ± 0.00e | 0.18 ± 0.00cd | 0.18 ± 0.00bcd | 0.18 ±0.00bc | 0.22 ± 0.01a | 0.17 ± 0.00de | 120.83 | < 0.001 |

**Table 2** Pearson correlation coefficients for phospholipid fatty acids with the first and second root in the discriminant function analyses at 4 and 8 weeks after nematode inoculation. Control—no nematodes inoculated, bacterial feeders—BF (*Acrobeloides buetschlii*), fungal feeders—FF (*Aphelenchoides saprophilus*), plant feeders—PF (*Pratylenchus penetrans*)*.* *, **, and *** with *p* < 0.05, 0.01, and 0.001. (Table from Maboreke [35], modified).

|  | **4 weeks** | |  | **8 weeks** | |
| --- | --- | --- | --- | --- | --- |
|  | Root 1 | Root 2 |  | Root 1 | Root 2 |
| i15:0 (G+) | -0.540*** | -0.806*** |  | 0.865*** | 0.014 |
| a15:0 (G+) | -0.519*** | -0.804*** |  | 0.779*** | 0.189 |
| i16:0 (G+) | -0.607*** | -0.275 |  | 0.756*** | -0.120 |
| i17:0 (G+) | -0.407** | -0.343* |  | 0.643*** | -0.165 |
| a17:0 (G+) | -0.462** | -0.282 |  | 0.902*** | 0.187 |
| cy17:0 (G-) | -0.935*** | -0.176 |  | 0.902*** | 0.163 |
| cy19:0 (G-) | -0.736*** | -0.092 |  | 0.806*** | -0.066 |
| 16:1 7c (B) | -0.430** | -0.442 |  | 0.914*** | 0.237 |
| 16:1 5c (B) | -0.238 | -0.531 |  | 0.871*** | -0.141 |
| 18:1 9t (B) | -0.454** | -0.155 |  | 0.793*** | -0.271 |
| 16:0 10-meth (A) | -0.589*** | -0.308* |  | 0.874*** | -0.042 |
| 18:0 10- meth (A) | -0.590*** | 0.097 |  | 0.805*** | 0.033 |
| 18:2 6,9c (F) | -0.224 | 0.183 |  | 0.486** | -0.822*** |
| 18:1 9c (F) | -0.4186** | 0.072 |  | 0.864*** | -0.371* |
| 14:0 | -0.225 | -0.408** |  | 0.389 | 0.240 |
| 15:0 | 0.145 | -0.561*** |  | 0.349 | 0.355* |
| 16:0 | -0.645*** | -0.416** |  | 0.364 | -0.457** |
| 18:0 | -0.496** | 0.117 |  | 0.000 | -0.334* |

PLFA markers for: G+ - Gram-positive bacteria, G- - Gram-negative bacteria, B - bacteria in general, A - actinobacteria, F - fungi

**Table 3** Effects of inoculation of nematode trophic groups on root length (cm ± s.d.) root and shoot weight (g DW ± s.d.), and root/shoot ratio (± s.d.) of *Quercus robur* at 4 and 8 weeks after nematode inoculation. Control—no nematodes inoculated, bacterial feeders—BF (*Acrobeloides buetschlii*), fungal feeders—FF (*Aphelenchoides saprophilus*), plant feeders—PF (*Pratylenchus penetrans*)*.* Values within a row with at least one letter in common are not significantly different (Tukey HSD, *p* < 0.05). (Table from Maboreke [35], modified).

|  | **Control** | **BF** | **FF** | **PF** | **BF+FF** | **BF+PF** | **FF+PF** | **BF+FF+PF** |
| --- | --- | --- | --- | --- | --- | --- | --- | --- |
| **4 weeks** |  |  |  |  |  |  |  |  |
| Root length (cm) | 38.8 ± 8.1 | 42.8 ± 21.5 | 37.5 ± 13.8 | 37.5 ± 10.1 | 37.2 ± 15.0 | 38.3 ± 13.7 | 35.7 ± 11.6 | 45.7 ± 10.6 |
| Root biomass (g) | 3.8 ± 0.7 | 3.1 ± 1.4 | 3.2 ± 0.7 | 3.2 ± 0.7 | 3.2 ± 0.7 | 3.2 ± 0.9 | 3.8 ± 1.1 | 3.9 ± 0.9 |
| Shoot biomass (g) | 2.6 ± 0.6 | 2.4 ± 0.5 | 2.7 ± 0.3 | 2.6 ± 0.3 | 2.9 ± 0.7 | 2.5 ± 0.8 | 2.6 ± 0.3 | 2.7 ± 0.6 |
| root / shoot ratio | 1.5 ± 0.4 | 1.3 ± 0.6 | 1.2 ± 0.3 | 1.3 ± 0.4 | 1.2 ± 0.4 | 1.3 ± 0.2 | 1.5 ± 0.4 | 1.5 ± 0.5 |
|  |  |  |  |  |  |  |  |  |
| **8 weeks** |  |  |  |  |  |  |  |  |
| Root length (cm) | 39.0 ± 10.2 | 30.3 ± 10.0 | 35.3 ± 13.7 | 41.7 ± 9.4 | 46.5 ± 5.8 | 35.5 ± 12.9 | 35.0 ± 11.5 | 43.8 ± 9.4 |
| Root biomass (g) | 6.7 ± 0.7 | 5.8 ± 1.3 | 5.5 ± 0.9 | 4.7 ± 1.1 | 6.3 ± 2.1 | 5.8 ± 0.7 | 4.8 ± 0.6 | 6.8 ± 2.7 |
| Shoot biomass (g) | 3.0 ± 0.8 | 3.2 ± 0.6 | 3.2 ± 0.4 | 3.0 ± 0.5 | 3.1 ± 0.7 | 3.0 ± 0.6 | 3.2 ± 0.5 | 2.9 ± 0.5 |
| root / shoot ratio | 2.4 ± 0.2ab | 1.9 ± 0.1c | 1.8 ± 0.3cd | 1.54 ± 0.12d | 2.1 ± 0.1bc | 2.0 ± 0.2c | 1.5 ± 0.1d | 2.4 ± 0.1a |

**Table S1** Effects of inoculation of nematode trophic groups on the overall population density (individuals g-1 soil ± s.d.) in the soil of *Quercus robur* seedlings. Presented are data at four and eight weeks after nematode inoculation. Control - no nematodes inoculated, BF – the bacterial feeder *Acrobeloides buetschlii*, FF – the fungal feeder *Aphelenchoides saprophilus*, and PF – the plant feeder *Pratylenchus penetrans.* ANOVA with *, **, and *** at *P* <0.05, 0.01, and 0.001, respectively. Values in a row with no or at least one letter in common are not significantly different (Tukey’s HSD test, *P* < 0.05)

|  | **Control** | **BF** | **FF** | **PF** | **BF+FF** | **BF+PF** | **FF+PF** | **BF+FF+PF** |
| --- | --- | --- | --- | --- | --- | --- | --- | --- |
| **4 weeks** |  |  |  |  |  |  |  |  |
| Nematodes (Ind. g-1 soil) | 12.5 ± 4.0 | 12.9 ± 4.8 | 15.2 ± 8.8 | 14.4 ± 7.9 | 13.8 ± 5.8 | 15.2 ± 9.2 | 17.7 ± 8.1 | 8.1 ± 3.8 |
| **8 weeks** |  |  |  |  |  |  |  |  |
| Nematodes (Ind. g-1 soil) | 19.5 ± 7.5ab | 7.8 ± 5.2ab | 7.4 ± 5.9b | 9.84 ± 5.6ab | 11.3 ± 1.6ab | 19.9 ± 11.0a | 16.6 ± 7.2ab | 9.2 ± 6.0ab |
|  |  |  |  |  |  |  |  |  |

**Table S2** Effects of inoculation of nematode trophic groups on the relative abundance of the dominant taxa and trophic groups (percentage %) in the soil of *Quercus robur* seedlings. Presented are data at four and eight weeks after nematode inoculation. Control - no nematodes inoculated, BF – the bacterial feeder *Acrobeloides buetschlii*, FF – the fungal feeder *Aphelenchoides saprophilus*, and PF – the plant feeder *Pratylenchus penetrans.* ANOVA with *, **, and *** at *P* <0.05, 0.01, and 0.001, respectively. Values in a row with at least one letter in common are not significantly different (Tukey’s HSD test, *P* < 0.05).

|  | **C** | **BF** | **FF** | **PF** | **BF+FF** | **BF+PF** | **FF+PF** | **BF+FF+PF** |
| --- | --- | --- | --- | --- | --- | --- | --- | --- |
| **4 weeks** | |  |  |  |  |  |  |  |
| **Bacterial feeders**  *Acrobeloides* | 75.6 ± 3.4b | 79.2 ± 2.9a | 58.5 ± 2.4ef | 55.8 ± 2.6f | 68.9 ± 0.8cd | 63.4 ± 1.6de | 69.0 ± 0.8cd | 69.9 ± 2.0bc |
| *Rhabditids* | 7.1 ± 1.3a | 2.1 ± 0.6b | 6.5 ± 2.6a | 1.7 ± 1.2b | 2.0 ± 1.0b | 1.3 ± 0.5b | 1.1 ± 0.1b | 1.4 ± 1.5b |
| Other BF | 5.2 ± 3.2a | 4.2 ± 0.6a | 4.4 ± 2.6a | 2.7 ± 1.2a | 5.1 ± 1.1a | 4.4 ± 3.1a | 1.8 ± 1.2a | 2.8 ± 1.7a |
| Total BF | 87.6 ± 0.9a | 85.3 ± 0.5a | 69.4 ± 0.9d | 60.3 ± 1.1e | 75.9 ± 0.4b | 70.5 ± 0.7d | 71.9 ± 0.8cd | 74.0 ± 0.6c* |
| **Fungal feeders**  *Aphelenchoides* | 4.7 ± 1.2d | 1.0 ± 0.5e | 23.5 ± 1.3a | 3.4 ± 1.2de | 17.4 ± 2.1b | 2.7 ± 0.6de | 14.5 ± 1.4c | 12.3 ± 0.3c |
| Other FF | 2.0 ± 0.7a | 3.1 ± 1.0a | 2.7 ± 1.5a | 1.7 ± 0.6a | 1.0 ± 0.8a | 3.3 ± 0.6a | 1.8 ± 1.2a | 1.8 ± 0.6a |
| Total FF | 6.8 ± 0.4e | 4.1 ± 0.9f | 26.2 ± 0.5a | 5.1 ± 1.0f | 18.4 ± 0.5b | 6.1 ± 1.0ef | 16.2 ± 0.6c | 14.0 ± 0.6d |
| **Plant feeders**  *Pratylenchus* | 1.9 ± 1.7d | 5.2 ± 0.1d | 3.1 ± 1.0d | 25.3 ± 1.6a | 3.1 ± 0.4d | 21.6 ± 1.6b | 10.1 ± 0.7c | 11.6 ± 0.9c |
| Other PF | 3.5 ± 2.1cd | 5.2 ± 1.0b | 1.4 ± 1.2d | 9.2 ± 0.9a | 2.4 ± 0.6cd | 3.3 ± 1.1cd | 2.3 ± 0.6cd | 1.0 ± 0.8d |
| Total PF | 5.6 ± 0.5e | 10.7 ± 0.6cd | 4.4 ± 0.6e | 34.6 ± 1.0a | 5.8 ± 0.5e | 23.4 ± 0.8b | 11.9 ± 0.4c | 11.9 ± 0.8c |
| **8 weeks** | |  |  |  |  |  |  |  |
| **Bacterial feeders**  *Acrobeloides* | 75.2 ± 2.8ab | 77.3 ± 3.0a | 66.2 ± 1.4c | 66.5 ± 1.7bc | 70.4 ± 0.3abc | 69.8 ± 7.2abc | 63.2 ± 2.4c | 67.0 ± 0.3bc |
| *Rhabditids* | 1.0 ± 1.0a | 2.8 ± 0.6a | 1.7 ± 0.6a | 3.1 ± 2.1a | 2.0 ± 1.0a | 3.9 ± 3.0a | 2.7 ± 1.6a | 2.7 ± 0.6a |
| Other BF | 5.2 ± 2.1a | 2.5 ± 2.3a | 2.1 ± 1.0a | 4.1 ± 1.0a | 1.7 ± 0.6a | 7.4 ± 4.8a | 3.1 ± 1.1a | 6.5 ± 0.7a |
| Total BF | 81.4 ± 0.7a | 82.7 ± 1.2a | 70.0 ± 1.7c* | 73.8 ± 1.0b* | 74.1 ± 0.6b* | 81.0 ± 0.3a | 69.1 ± 0.3c* | 76.2 ± 0.4b* |
| **Fungal feeders**  *Aphelenchoides* | 13.1 ± 0.5cd | 7.1 ± 2.4ef | 21.7 ± 1.7a | 4.2 ± 1.9fg | 17.7 ± 0.8b | 2.1 ± 1.0g | 16.8 ± 1.0bc | 10.9 ± 0.7de |
| Other FF | 1.4 ± 0.6a | 3.2 ± 1.9a | 2.1 ± 1.0a | 2.1 ± 1.0a | 1.0 ± 0.7a | 1.1 ± 0.9a | 0.7 ± 1.1a | 2.4 ± 1.5a |
| Total FF | 14.5 ± 0.7c | 10.3 ± 0.6d | 23.8 ± 0.9a | 6.2 ± 1.1e | 18.7 ± 0.4b | 3.2 ± 0.2f | 17.5 ± 0.2b | 13.3 ± 1.0c |
| **Plant feeders**  *Pratylenchus* | 2.1 ± 1.1d | 2.1 ± 1.0d | 2.8 ± 0.6d | 17.9 ± 0.4a | 6.1 ± 1.0c | 14.8 ± 1.2b | 12.4 ± 1.1b | 6.5 ± 1.6c |
| Other PF | 2.1 ± 1.0bc | 5.0 ± 1.3a | 3.4 ± 0.6abc | 2.1 ± 1.0abc | 1.0 ± 0.8c | 1.0 ± 1.1c | 1.0 ±0.9c | 4.1 ± 1.0ab |
| Total PF | 4.1 ± 0.1f | 7.1 ± 0.6e | 6.2 ± 1.0e | 20.0 ± 0.6a | 7.1 ± 1.1e | 15.8 ± 0.3b | 13.4 ± 0.2c | 10.5 ± 0.6d |

**Table S3** Effects of inoculation of nematode trophic groups on the amounts of individual soil phospholipid fatty acids (PLFAs in nmol g-1 ± s.d) at four weeks after nematode inoculation. Control - no nematodes, BF – the bacterial feeder *Acrobeloides buetschlii*, FF – the fungal feeder *Aphelenchoides saprophilus*, and PF – the plant feeder *Pratylenchus penetrans.* Values in a row with at least one letter in common are not significantly different (Tukey’s HSD test, *P* < 0.05).

|  | **C** | **BF** | **FF** | **PF** | **BF+FF** | **BF+PF** | **FF+PF** | **BF+FF+PF** |
| --- | --- | --- | --- | --- | --- | --- | --- | --- |
| i15:0 (G+) | 3.19 ± 0.05c | 3.30 ± 0.08abc | 3.19 ± 0.01c | 3.29 ± 0.05bc | 3.39 ± 0.12ab | 2.51 ± 0.10d | 3.49 ± 0.19a | 3.32 ± 0.04abc |
| a15:0 (G+) | 2.00 ± 0.02b | 2.04 ± 0.03ab | 1.99 ± 0.04b | 2.12 ± 0.07ab | 2.15 ± 0.12a | 1.54 ± 0.03c | 2.17 ± 0.12a | 2.06 ± 0.03ab |
| i16:0 (G+) | 1.48 ± 0.04bc | 1.52 ± 0.04abc | 1.52 ± 0.20abc | 1.43 ± 0.09c | 1.63 ± 0.10ab | 1.37 ± 0.02c | 1.64 ± 0.09ab | 1.66 ± 0.05a |
| i17:0 (G+) | 0.99 ± 0.03ab | 0.98 ± 0.06ab | 0.93 ± 0.07ab | 0.98 ± 0.07ab | 1.00 ± 0.07ab | 0.91 ± 0.08b | 1.01 ± 0.03a | 1.03 ± 0.03a |
| a17:0 (G+) | 0.93 ± 0.20ab | 0.82 ± 0.05ab | 0.84 ± 0.16ab | 0.85 ± 0.03ab | 0.91 ± 0.06ab | 0.75 ± 0.10b | 0.97 ± 0.06a | 0.95 ± 0.03ab |
| cy17:0 (G-) | 1.46 ± 0.03c | 1.40 ± 0.02cd | 1.42 ± 0.03cd | 1.45 ± 0.10c | 1.64 ± 0.06b | 1.35 ± 0.02d | 1.84 ± 0.03a | 1.67 ± 0.05b |
| cy19:0 (G-) | 1.95 ± 0.11bcd | 1.94 ± 0.07bcd | 1.85 ± 0.07d | 2.02 ± 0.05abc | 2.05 ± 0.05ab | 1.91 ± 0.03cd | 2.11 ± 0.11a | 2.14 ± 0.07a |
| 16:1 7c (B) | 2.40 ± 0.17a | 2.37 ± 0.09ab | 2.13 ± 0.05bc | 2.13 ± 0.32bc | 2.31 ± 0.04ab | 2.01 ± 0.04c | 2.52 ± 0.02a | 2.38 ± 0.04ab |
| 16:1 5c (B) | 1.13 ± 0.02ab | 1.21 ± 0.10a | 1.02 ± 0.04bc | 1.03 ± 0.17bc | 1.11 ± 0.03ab | 0.95 ± 0.07c | 1.17 ± 0.06a | 1.14 ± 0.03ab |
| 18:1 9t (B) | 3.25 ± 0.46 | 3.15 ± 0.26 | 3.13 ± 0.06 | 3.33 ± 0.06 | 3.30 ± 0.05 | 3.09 ± 0.25 | 3.38 ± 0.08 | 3.43 ± 0.02 |
| 16:0 10-meth (A) | 2.67 ± 0.08 | 2.68 ± 0.13abc | 2.56 ± 0.09bc | 2.62 ± 0.28abc | 2.82 ± 0.06ab | 2.45 ± 0.30c | 2.89 ± 0.08a | 2.86 ± 0.06ab |
| 18:0 10-meth (A) | 1.75 ± 0.25ab | 1.65 ± 0.08b | 1.69 ± 0.08ab | 1.78 ± 0.15ab | 1.88 ± 0.08ab | 1.74 ± 0.14ab | 1.90 ± 0.14ab | 1.99 ± 0.03a |
| 18:2 6,9c (F) | 0.90 ± 0.05 | 0.82 ± 0.05 | 0.85 ± 0.13 | 0.83 ± 0.06 | 0.93 ± 0.12 | 0.89 ± 0.26 | 0.85 ± 0.06 | 1.04 ± 0.06 |
| 18:1 9c (F) | 3.01 ± 0.55 | 2.86 ± 0.43 | 2.84 ± 0.37 | 3.08 ± 0.56 | 3.12 ± 0.12 | 3.02 ± 0.29 | 3.35 ± 0.07 | 3.29 ± 0.03 |
| 14:0 | 0.45 ± 0.02 | 0.48 ± 0.11 | 0.48 ± 0.05 | 0.47 ± 0.10 | 0.48 ± 0.11 | 0.37 ± 0.04 | 0.51 ± 0.05 | 0.46 ± 0.12 |
| 15:0 | 0.35 ± 0.04 | 0.46 ± 0.03 | 0.33 ± 0.01 | 0.35 ± 0.04 | 0.36 ± 0.05 | 0.29 ± 0.05 | 0.36 ± 0.03 | 0.33 ± 0.08 |
| 16:0 | 6.96 ± 0.41b | 6.85 ± 0.10bc | 6.96 ± 0.15b | 7.42 ± 0.26ab | 7.34 ± 0.51ab | 6.30 ± 0.42c | 7.49 ± 0.16ab | 7.69 ± 0.30a |
| 18:0 | 1.21 ± 0.15b | 1.22 ± 0.12ab | 1.17 ± 0.06b | 1.30 ± 0.03ab | 1.28 ± 0.11ab | 1.26 ± 0.03ab | 1.37 ± 0.10ab | 1.43 ± 0.21a |

PLFA markers for: G+ - Gram-positive bacteria, G- - Gram-negative bacteria, B – bacteria in general, A – actinobacteria, F - fungi

**Table S4** Effects of inoculation of nematode trophic groups on the amounts of individual soil phospholipid fatty acids (PLFAs in nmol g-1 ± s.d) at eight weeks after nematode inoculation. Control - no nematodes, BF – the bacterial feeder *Acrobeloides buetschlii*, FF – the fungal feeder *Aphelenchoides saprophilus*, and PF – the plant feeder *Pratylenchus penetrans.* Values in a row with at least one letter in common are not significantly different (Tukey’s HSD test, *P* < 0.05).

|  | **C** | **BF** | **FF** | **PF** | **BF+FF** | **BF+PF** | **FF+PF** | **BB+FF+PF** |
| --- | --- | --- | --- | --- | --- | --- | --- | --- |
| i15:0 (G+) | 2.88 ± 0.05d | 2.71± 0.12e | 2.55 ± 0.07f | 2.97 ± 0.04cd | 3.02 ± 0.08bc | 3.26 ± 0.05a | 3.02 ± 0.01bc | 3.09 ± 0.01b |
| a15:0 (G+) | 1.86 ± 0.04c | 1.68 ± 0.05d | 1.68 ± 0.03d | 1.98 ± 0.05b | 1.89 ± 0.04c | 2.11 ± 0.02a | 1.89 ± 0.05c | 1.99 ± 0.04b |
| i16:0 (G+) | 1.45 ± 0.04c | 1.48 ± 0.07bc | 1.33 ± 0.06d | 1.48 ± 0.06bc | 1.55 ± 0.09abc | 1.61 ± 0.05a | 1.53 ± 0.03abc | 1.58 ± 0.01ab |
| i17:0 (G+) | 0.92 ± 0.05d | 0.96 ± 0.08e | 0.87 ± 0.03e | 0.93 ± 0.03cd | 0.98 ± 0.04b | 1.02 ± 0.09bcd | 0.99 ± 0.05bc | 1.04 ± 0.01a |
| a17:0 (G+) | 0.80 ± 0.02 | 0.73 ± 0.02 | 0.72 ± 0.03 | 0.82 ± 0.03 | 0.90 ± 0.06 | 0.85 ± 0.03 | 0.86 ± 0.02 | 1.02 ± 0.02 |
| cy17:0 (G-) | 1.30 ± 0.04d | 1.30 ± 0.01d | 1.20 ± 0.08e | 1.56 ± 0.04b | 1.59 ± 0.04b | 1.60 ± 0.06b | 1.49 ± 0.03c | 1.80 ± 0.02a |
| cy19:0 (G-) | 1.99 ± 0.5cd | 2.04 ± 0.02c | 1.88 ± 0.09e | 1.95 ± 0.02de | 2.12 ± 0.06b | 2.12 ± 0.05b | 2.07 ± 0.02bc | 2.22 ± 0.04 a |
| 16:1 7c (B) | 1.90 ± 0.02d | 1.53 ± 0.04f | 1.57 ± 0.06f | 1.79 ± 0.04e | 2.16 ± 0.04b | 1.90 ± 0.06d | 1.99 ± 0.02c | 2.32 ± 0.05a |
| 16:1 5c (B) | 0.93 ± 0.05cd | 0.91 ± 0.03cd | 0.86 ± 0.04d | 0.95 ± 0.04bc | 1.02 ± 0.04ab | 1.02 ± 0.07ab | 1.06 ± 0.02a | 1.09 ± 0.04a |
| 18:1 9t (B) | 3.06 ± 0.03c | 3.10 ± 0.07c | 2.70 ± 0.07e | 2.88 ± 0.03d | 3.10 ± 0.06c | 3.08 ± 0.05c | 3.29 ± 0.03b | 3.53 ± 0.02a |
| 16:0 10-meth (A) | 2.47 ± 0.05d | 2.55 ± 0.04cd | 2.24 ± 0.04e | 2.55 ± 0.02cd | 2.64 ± 0.04b | 2.65 ± 0.04b | 2.61 ± 0.05bc | 2.89 ± 0.05a |
| 18:0 10-meth (A) | 1.71 ± 0.02c | 1.74 ± 0.02c | 1.56 ± 0.07d | 1.71 ± 0.06c | 1.86 ± 0.07ab | 1.81 ± 0.05bc | 1.77 ± 0.05bc | 1.93 ± 0.07a |
| 18:2 6,9c (F) | 0.83 ± 0.08e | 1.01 ± 0.02e | 0.78 ± 0.05e | 0.89 ± 0.06de | 0.99 ± 0.04cd | 1.23 ± 0.06b | 1.73 ± 0.03a | 0.99 ± 0.08cd |
| 18:1 9c (F) | 2.72 ± 0.1e | 2.79 ± 0.06de | 2.36 ± 0.06f | 2.91 ± 0.05c | 3.03 ± 0.05b | 2.90 ± 0.07cd | 3.30 ± 0.07a | 3.19 ± 0.02a |
| 14:0 | 0.43 ± 0.04ab | 0.38 ± 0.06b | 0.40 ± 0.07ab | 0.46 ± 0.08ab | 0.51 ± 0.05a | 0.47 ± 0.03ab | 0.43 ± 0.05ab | 0.44 ± 0.08ab |
| 15:0 | 0.32 ± 0.03 | 0.29 ± 0.05 | 0.28 ± 0.06 | 0.34 ± 0.03 | 0.35 ± 0.03 | 0.34 ± 0.03 | 0.29 ± 0.04 | 0.33 ± 0.02 |
| 16:0 | 6.60 ± 0.57bc | 7.09 ± 0.38abc | 6.49 ± 0.26c | 6.61 ± 0.22bc | 6.47 ± 0.36c | 7.11 ± 0.34abc | 7.29 ± 0.36ab | 7.35 ± 0.39a |
| 18:0 | 1.20 ± 0.06b | 1.42 ± 0.08a | 1.12 ± 0.02b | 1.22 ± 0.03b | 1.24 ± 0.14b | 1.22 ± 0.16b | 1.24 ± 0.03b | 1.24 ± 0.09b |

PLFA markers for: G+ - Gram-positive bacteria, G- - Gram-negative bacteria, B – bacteria in general, A – actinobacteria, F - fungi
